# Supplementary material
Source: publisher figshare collection journal article supplement (https://acs.figshare.com/ndownloader/files/12972491)
Supplement: Supplementary file 1 [file 12972491]

# Supporting Information

for

## Sustainable carboxylation of diamines with hydrogen carbonate.

Gianpiero Forte,<sup>a,\*</sup> Isabella Chiarotto,<sup>a</sup> Frank Richter,<sup>b</sup> Vinh Trieu,<sup>b</sup> Marta Feroci <sup>a,\*</sup>

<sup>a</sup> *Dipartimento di Scienze di Base e Applicate per l'Ingegneria, Sapienza Università di Roma, Via del Castro Laurenziano 7, 00161 Roma, Italy.*

*\*E-mail: [gianpiero.forte@uniroma1.it](mailto:gianpiero.forte@uniroma1.it); [marta.feroci@uniroma1.it](mailto:marta.feroci@uniroma1.it)*

<sup>b</sup> *Covestro Deutschland AG, Kaiser-Wilhelm-Allee 60, 51365 Leverkusen, Germany*

## **Table of Contents**

|                        |             |
|------------------------|-------------|
| <b>1. Experimental</b> | <b>S-3</b>  |
| <b>2. NMR spectra</b>  | <b>S-5</b>  |
| <b>3. References</b>   | <b>S-13</b> |

## 1. Experimental

### ***Preparation of TEAHC according to reported procedure.***

Dry tetraethylammonium chloride was dissolved in methanol (~2 mmol/ml) and KOH (1.0 equivalent) was added. A white precipitate immediately forms. The reaction was allowed to stir for 2h at room temperature, then the precipitate was filtered off. CO<sub>2</sub> was slowly bubbled into the solution for 1h, and the solvent was evaporated under reduced pressure. The resulting TEAHC, as a white solid, was kept overnight under high vacuum.

### **Carboxylation scale-up with SpiroHC. Synthesis of dibutyl hexane-1,6-diyl dicarbamate, 1.**

SpiroHC (2.81 g, 15.0 mmol) was dissolved in 150 ml of acetonitrile, and hexamethylenediamine (0.58 g, 5.0 mmol, dissolved in 10 ml of acetonitrile) was added. The solution was allowed to stir at room temperature for 2h. Butyl chloride (2.1 ml, 20.0 mmol) was added, and the reaction mixture heated at 80 °C for 3h. The solvent was removed under reduced pressure, and the resulting residue was extracted with ethyl acetate (3 × 100 ml). The collected organic fractions were concentrated to dryness to afford 1.39 g of product (88% yield).

#### ***Dibutyl hexane-1,6-diyl dicarbamate, 1.<sup>a</sup>***

White powder, ≥ 82% yield (BuI), ≥ 82% yield (BuCl). <sup>1</sup>H NMR (200 MHz, CDCl<sub>3</sub>) δ= 5.00 (bs, 2H), 3.93 (t, *J* = 6.0 Hz, 4H), 3.04 (app. q, 4H), 1.51-1.24 (m, 16H, overlapped with H<sub>2</sub>O signal), 0.82 (t, *J* = 7.2 Hz, 6H); <sup>13</sup>C NMR (50 MHz, CDCl<sub>3</sub>) δ= 156.9, 64.4, 40.6, 31.0, 29.8, 26.2, 19.0, 13.6. *R*<sub>f</sub> = 0.3 (*n*-hexane: ethyl acetate 7:3).

#### ***Dibutyl (methylene-bis(cyclohexane-4,1-diyl))dicarbamate.<sup>a</sup>***

Off-white waxy solid, ≥ 83% yield (BuI), ≥ 85% yield (BuCl). <sup>1</sup>H NMR (200 MHz, CDCl<sub>3</sub>) δ= 4.77-4.73 (m, 1H), 4.50-4.45 (m, 1H), 4.03 (t, *J* = 6.2 Hz, 4H), 3.76 (bs, 1H), 3.41 (bs, 1H), 2.01-1.96 (m, 2H), 1.75-1.05 (m, 26H, overlapped with H<sub>2</sub>O signal), 0.92 (t, *J* = 7.2 Hz, 6H); <sup>13</sup>C NMR (50 MHz, CDCl<sub>3</sub>) δ= 156.1, 64.6, 50.4, 47.0, 44.1, 43.0, 33.8, 33.7, 33.5, 32.8, 32.1, 31.2, 29.8, 28.1, 19.2, 13.9. *R*<sub>f</sub> = 0.3 (*n*-hexane: ethyl acetate 8:2).

#### ***Butyl ((5-((butoxycarbonyl)amino)-1,3,3-trimethylcyclohexyl)methyl)carbamate.<sup>a</sup>***

Yellowish oil, ≥ 92% yield (BuI), ≥ 87% yield (BuCl). <sup>1</sup>H NMR (200 MHz, CDCl<sub>3</sub>) δ= 4.78-4.72 (m, 1H), 4.49-4.54 (m, 1H), 4.06-4.00 (m, 4H), 3.77 (bs, 1H), 3.25 (d, *J* = 6.2 Hz, 0.4H), 2.90 (d, *J* = 6.6 Hz, 1.5H), 1.74-1.15 (m, 11H, overlapped with H<sub>2</sub>O signal), 1.04 (s, 6H), 0.95-0.87 (m, 12H); <sup>13</sup>C NMR (50 MHz, CDCl<sub>3</sub>) δ= 157.2, 157.1\*, 156.1, 64.7, 64.5,

54.9, 47.5\*, 47.1, 46.4, 44.5, 42.7\*, 41.9, 36.4, 35.1, 31.9, 31.8\*, 31.1, 29.7, 27.7, 23.2, 19.12, 19.09, 13.8.  $R_f$  = 0.3 and 0.2 - pair of diastereomers - (*n*-hexane: ethyl acetate 8:2).

\* *minor diastereomers*.

***Dibutyl (1,3-phenylenebis(methylene))dicarbamate.<sup>b</sup>***

White solid,  $\geq 85\%$  yield (BuI),  $\geq 82\%$  yield (BuCl).  $^1\text{H}$  NMR (200 MHz,  $\text{CDCl}_3$ )  $\delta$  = 7.22-7.11 (m, 4H), 5.41 (bs, 2H), 4.24 (d,  $J$  = 5.8 Hz, 4H), 4.01 (t,  $J$  = 6.5 Hz, 4H), 1.58-1.47 (m, 4H), 1.37-1.26 (m, 4H), 0.88 (t,  $J$  = 7.2 Hz, 6H);  $^{13}\text{C}$  NMR (50 MHz,  $\text{CDCl}_3$ )  $\delta$  = 156.9, 139.1, 128.8, 126.3, 64.8, 44.7, 31.0, 19.0, 13.7.  $R_f$  = 0.1 (*n*-hexane: ethyl acetate 8:2).

***Diethyl (4-methyl-1,3-phenylene)dicarbamate.<sup>c</sup>***

Yellowish solid, 10% yield.  $^1\text{H}$  NMR (200 MHz,  $\text{CDCl}_3$ )  $\delta$  = 7.77 (d,  $J_m$  = 1.8 Hz, 1H), 7.22 (dd,  $J_o$  = 8.2 Hz,  $J_m$  = 1.8 Hz, 1H), 7.09 (d,  $J_o$  = 8.2 Hz, 1H), 6.64 (s, 1H), 6.40 (s, 1H), 4.28-4.15 (m, 4H), 2.19 (s, 3H), 1.35-1.27 (m, 6H);  $^{13}\text{C}$  NMR (50 MHz,  $\text{CDCl}_3$ )  $\delta$  = 153.9, 153.8, 136.9, 136.4, 130.9, 121.9, 114.4, 61.5, 61.3, 17.1, 14.7.  $R_f$  = 0.2 (*n*-hexane: ethyl acetate 8:2).

***Diethyl 1,4-phenylenedicarbamate.<sup>c</sup>***

White solid, 13% yield.  $^1\text{H}$  NMR (200 MHz,  $\text{CDCl}_3$ )  $\delta$  = 7.31 (s, 4H), 6.52 (bs, 2H), 4.21 (q,  $J$  = 7.2 Hz, 4H), 1.30 (t,  $J$  = 7.2 Hz, 6H);  $^{13}\text{C}$  NMR (50 MHz,  $\text{CDCl}_3$ )  $\delta$  = 153.9, 133.8, 119.8, 61.4, 14.7.  $R_f$  = 0.2 (*n*-hexane: ethyl acetate 8:2).

***5-azoniaspiro[4.4]nonane chloride, 2.<sup>d</sup>***

$^1\text{H}$  NMR (200 MHz,  $\text{CDCl}_3$ )  $\delta$  = 3.86 (bs, 8H), 2.28 (bs, 8H);  $^{13}\text{C}$  NMR (50 MHz,  $\text{CDCl}_3$ )  $\delta$  = 62.7, 22.1.

***5-azoniaspiro[4.4]nonane hydrogen carbonate, SpiroHC.***

$^1\text{H}$  NMR (200 MHz,  $\text{CDCl}_3$ )  $\delta$  = 3.70 (m, 8H), 2.15 (bs, 8H);  $^{13}\text{C}$  NMR (50 MHz,  $\text{D}_2\text{O}$ )  $\delta$  = 160.5, 62.8, 62.7, 62.6, 21.6.

## 2. NMR Spectra.

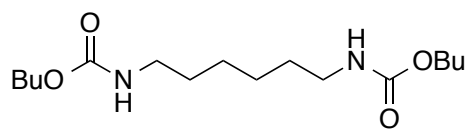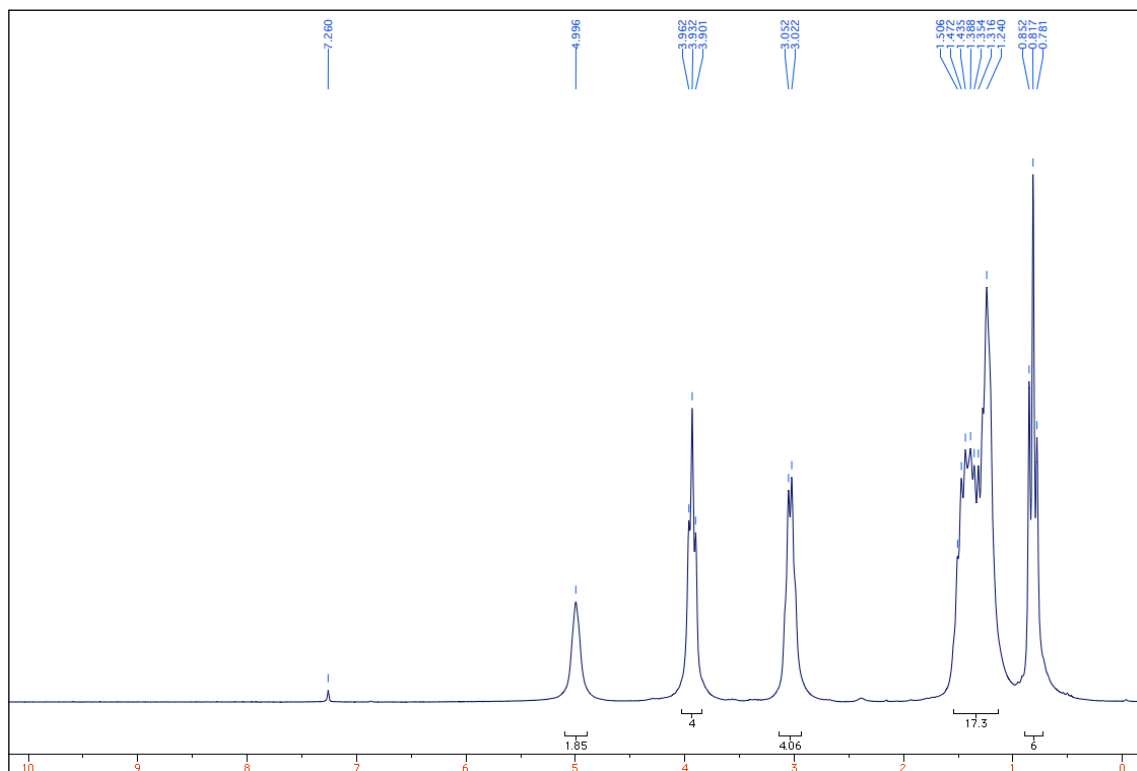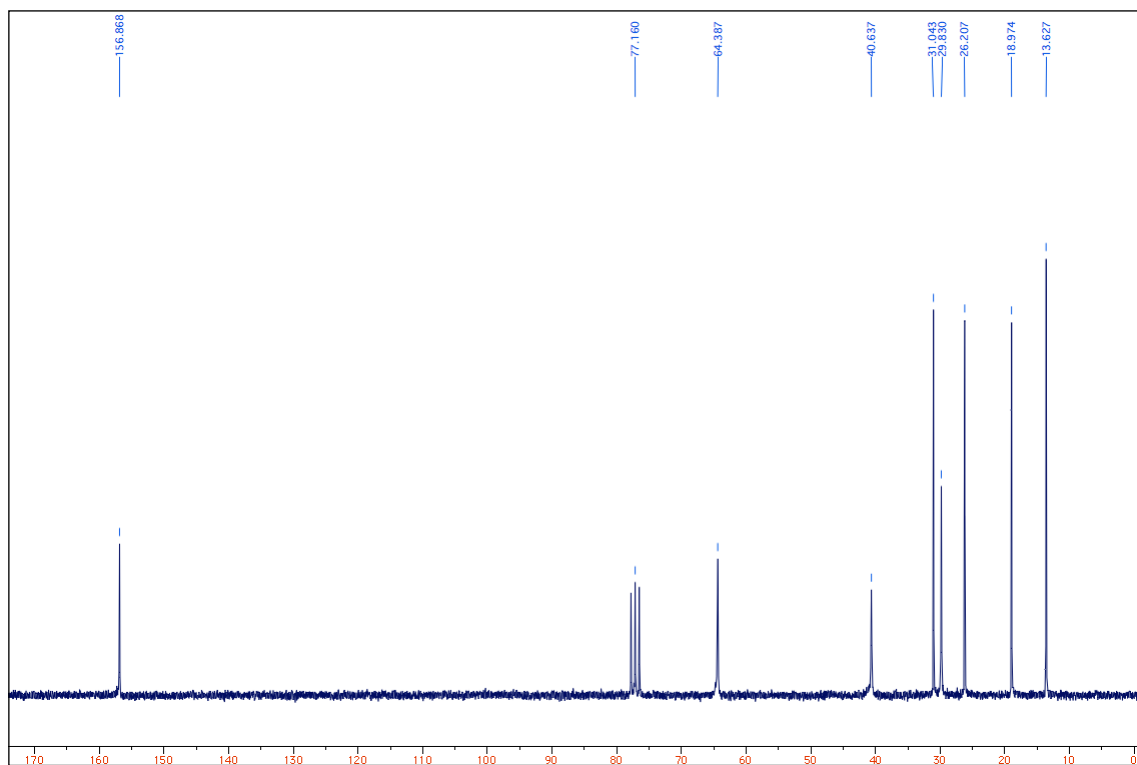

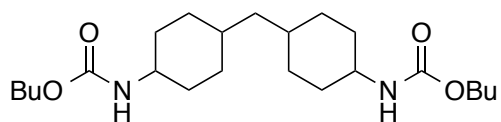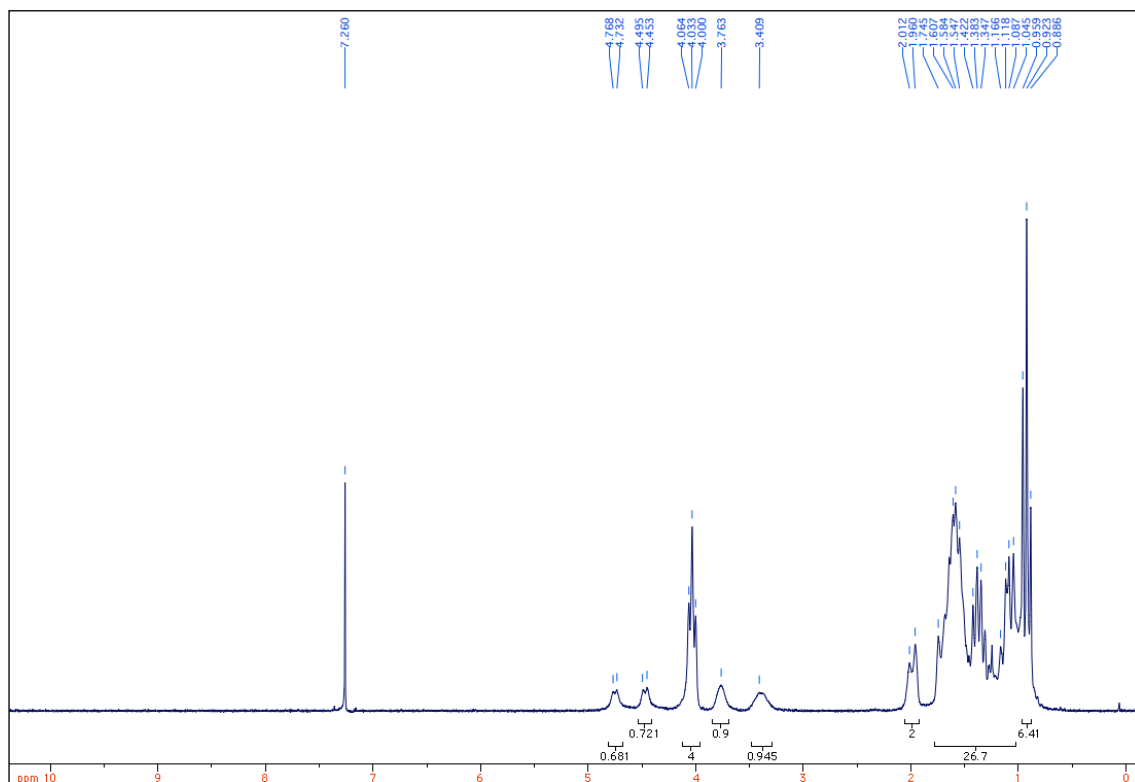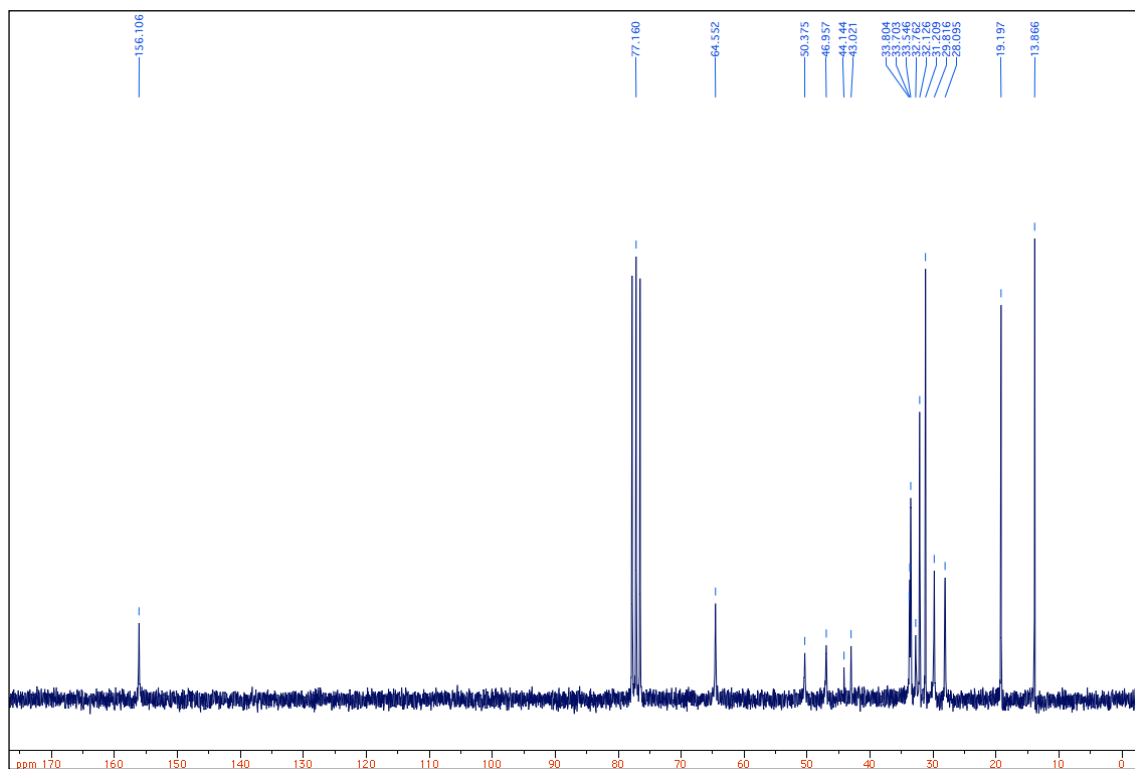

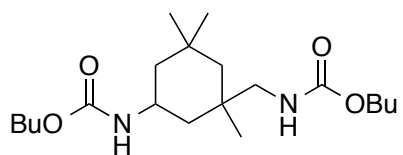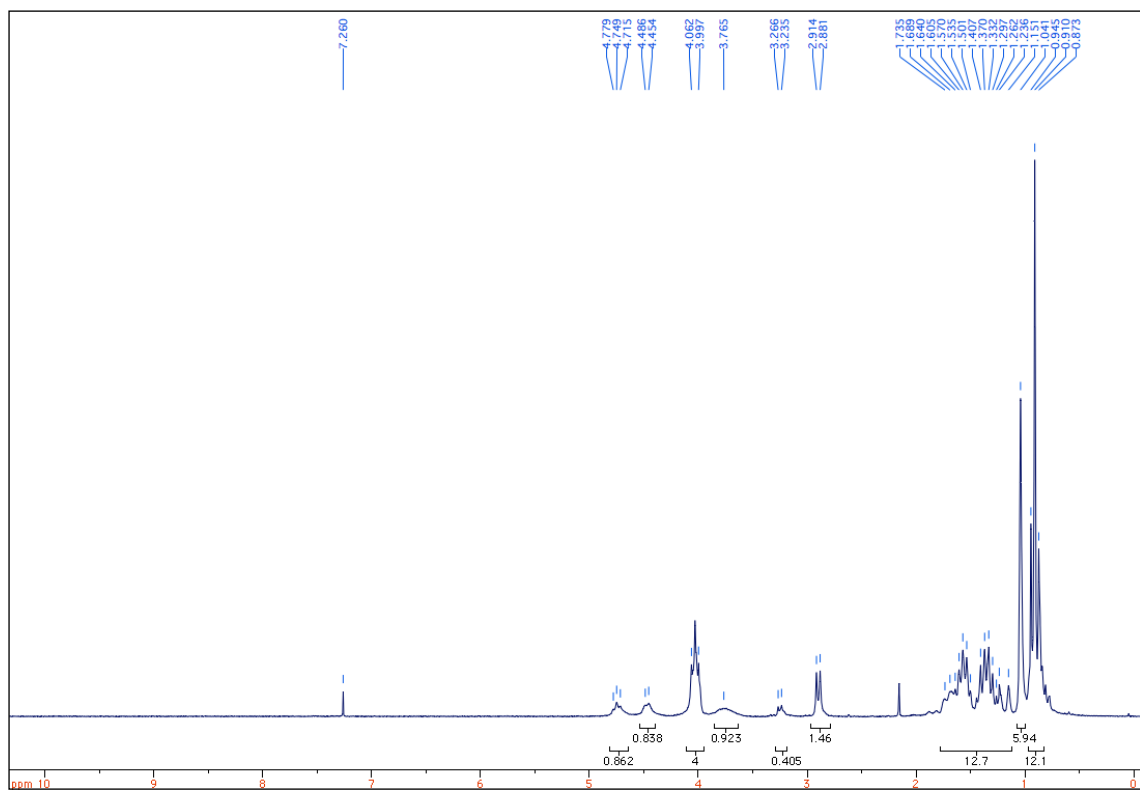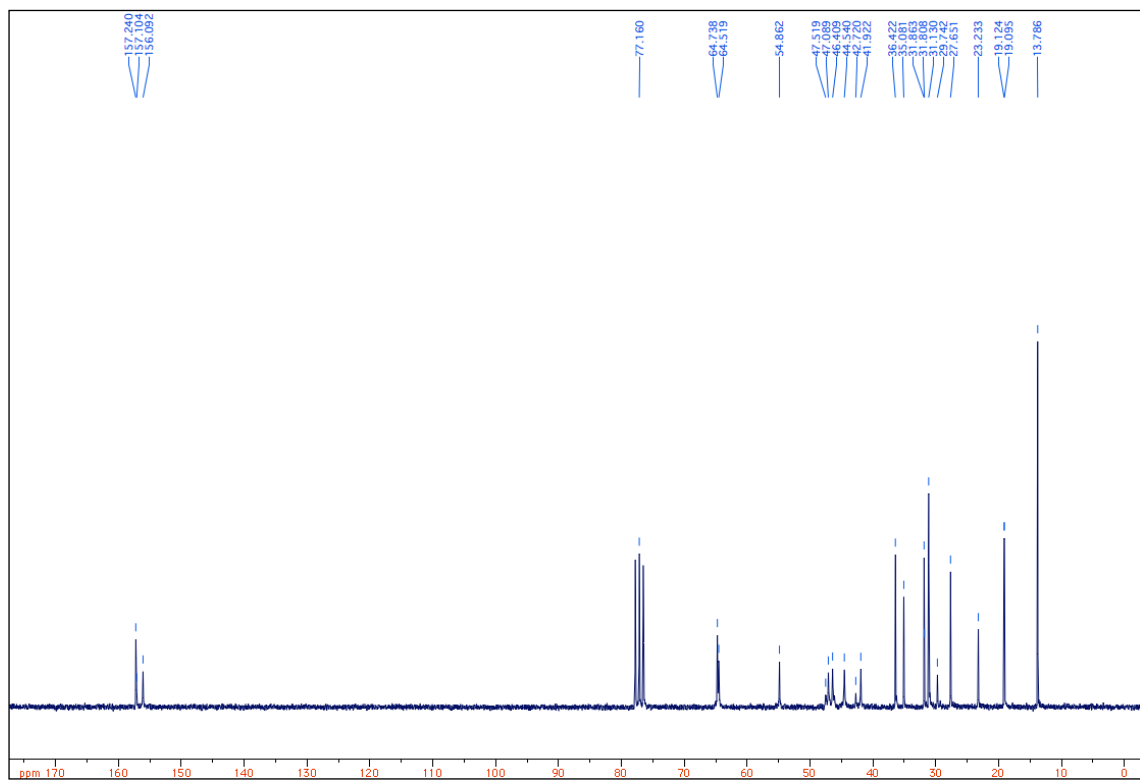

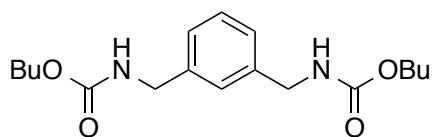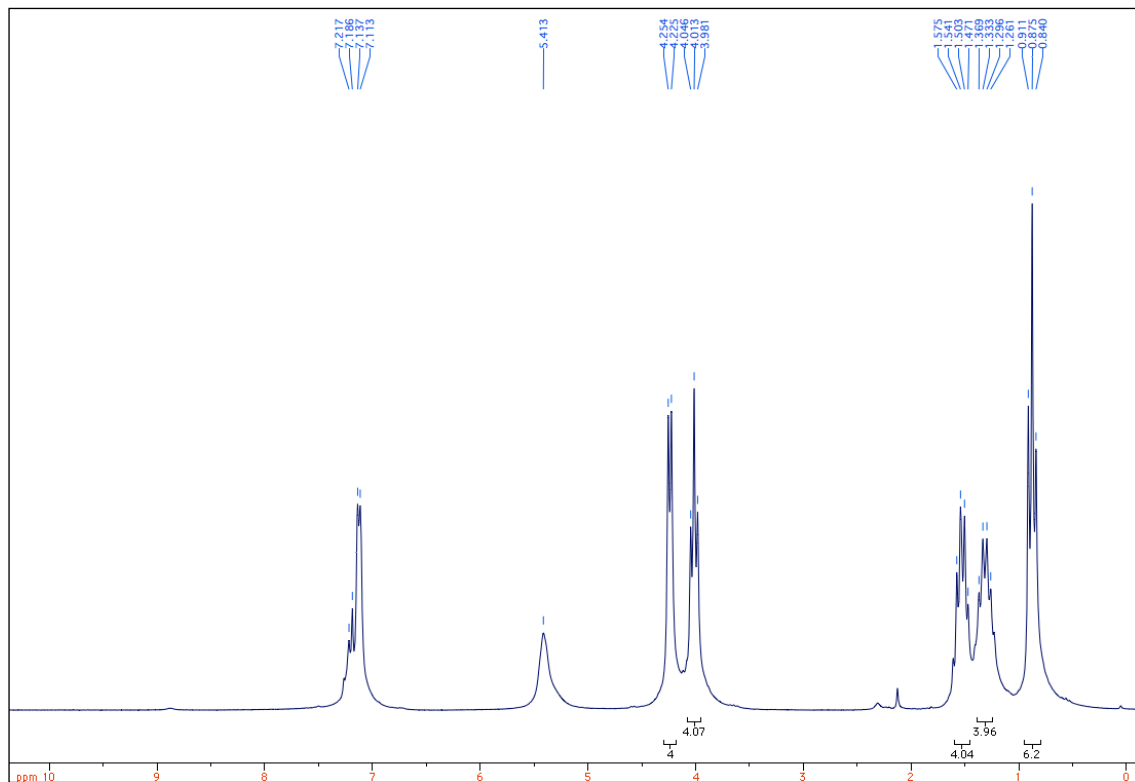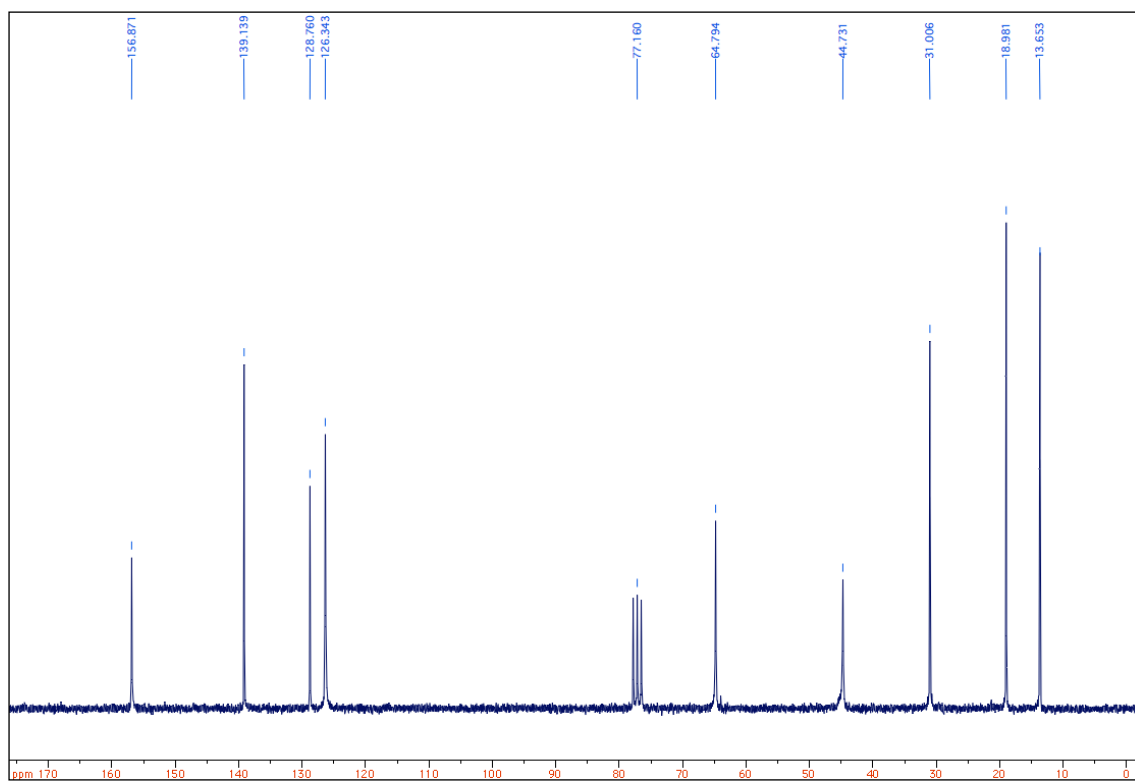



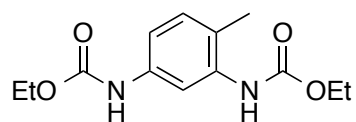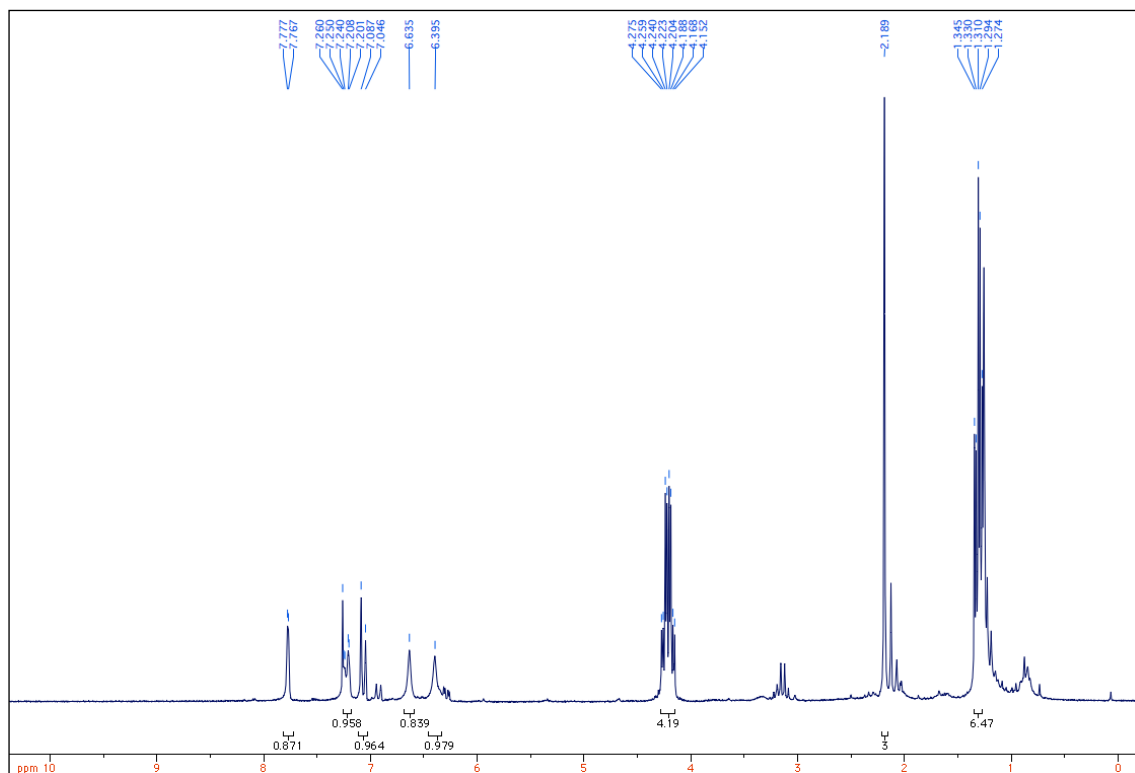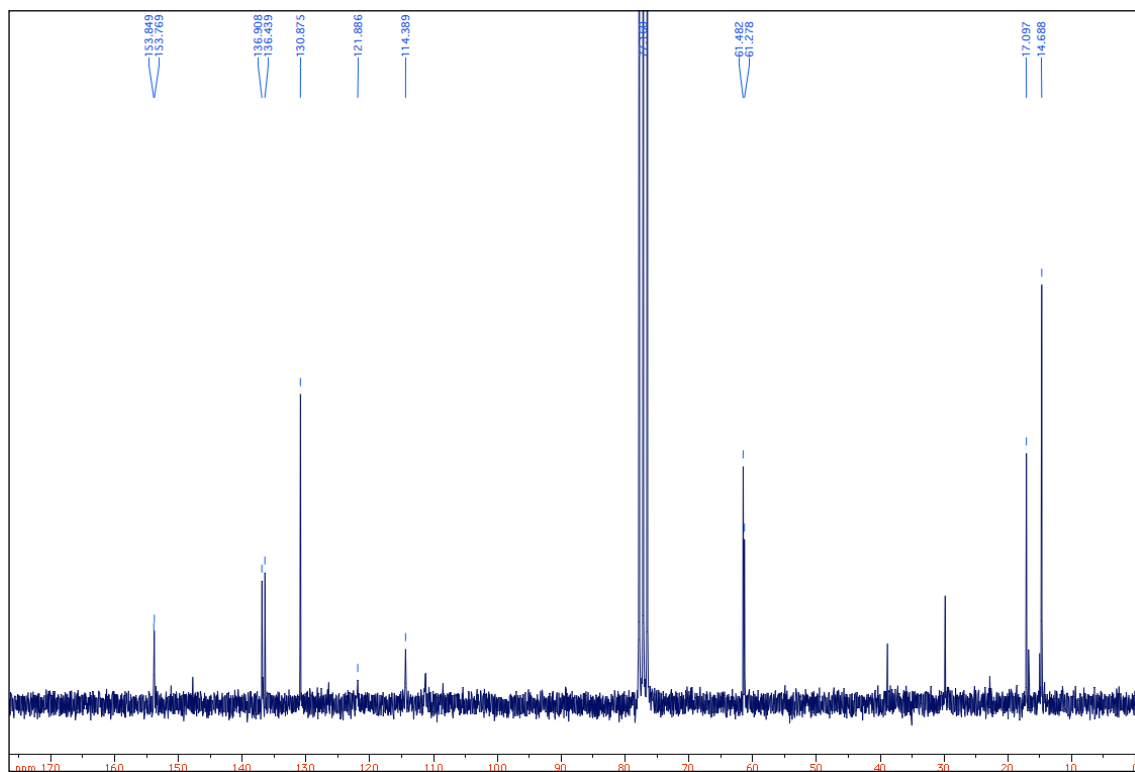

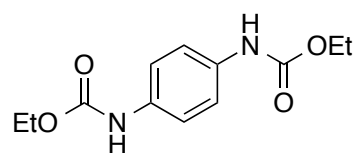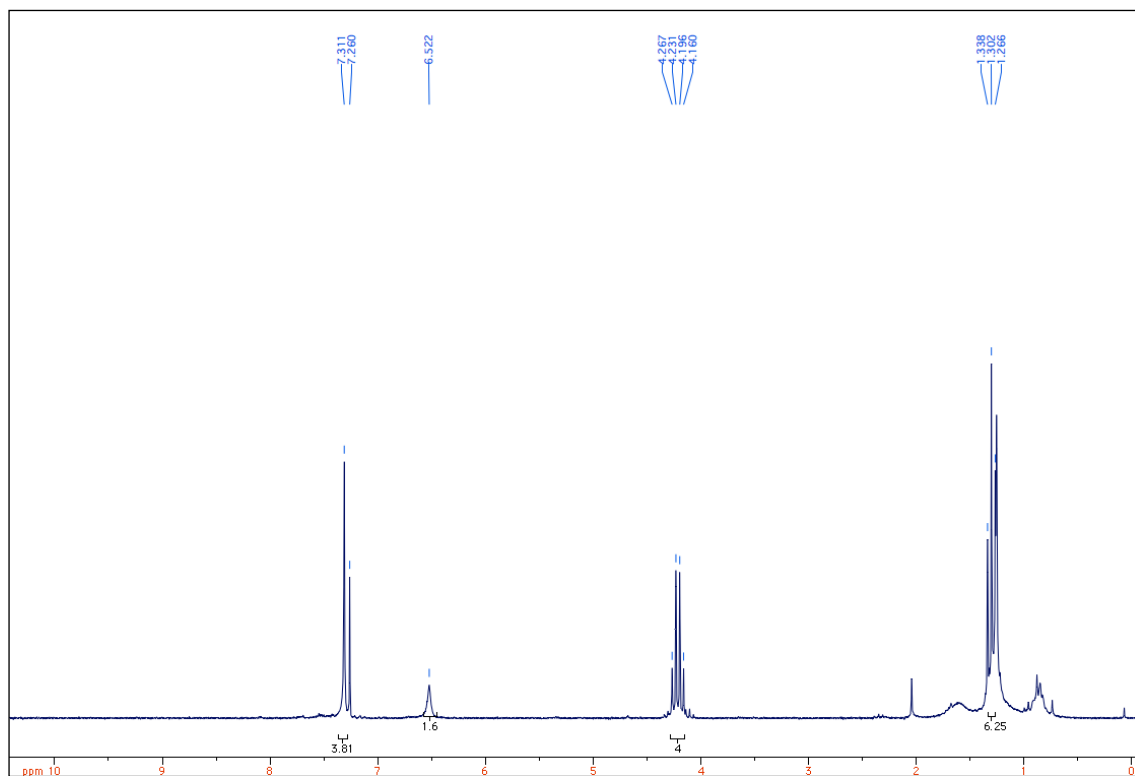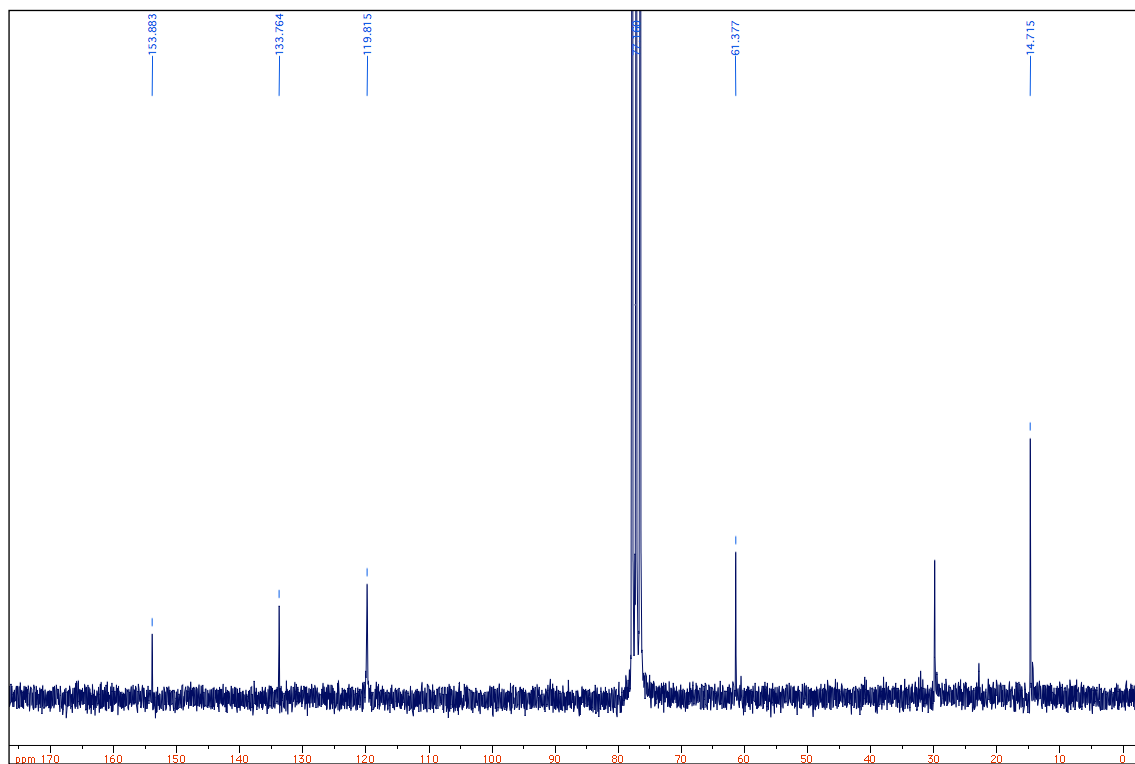

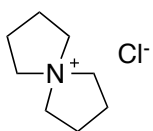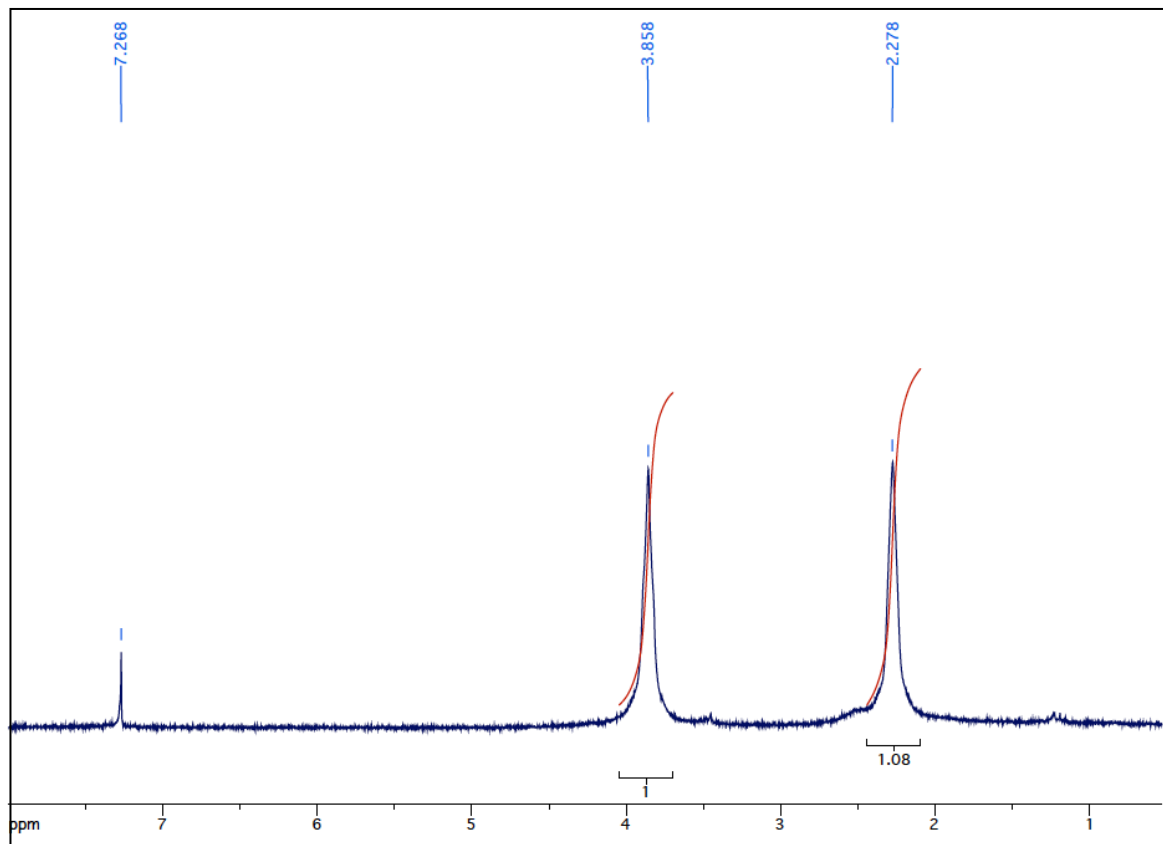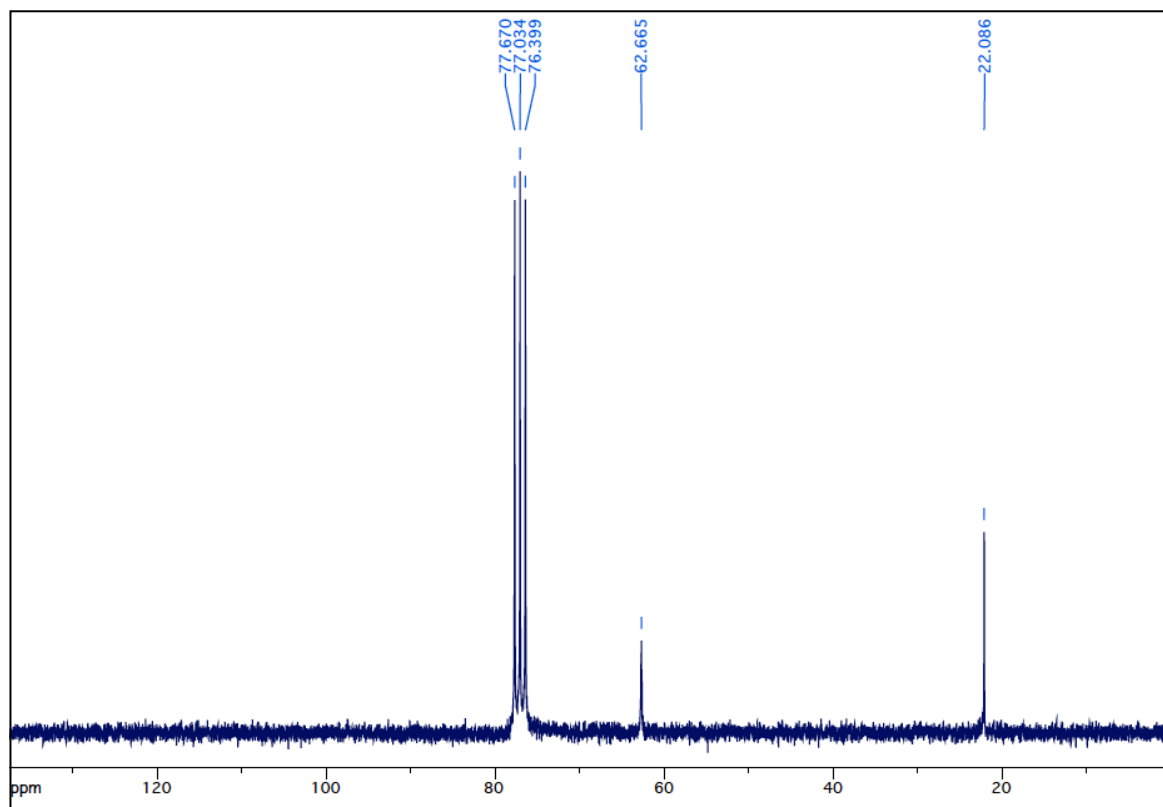

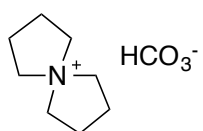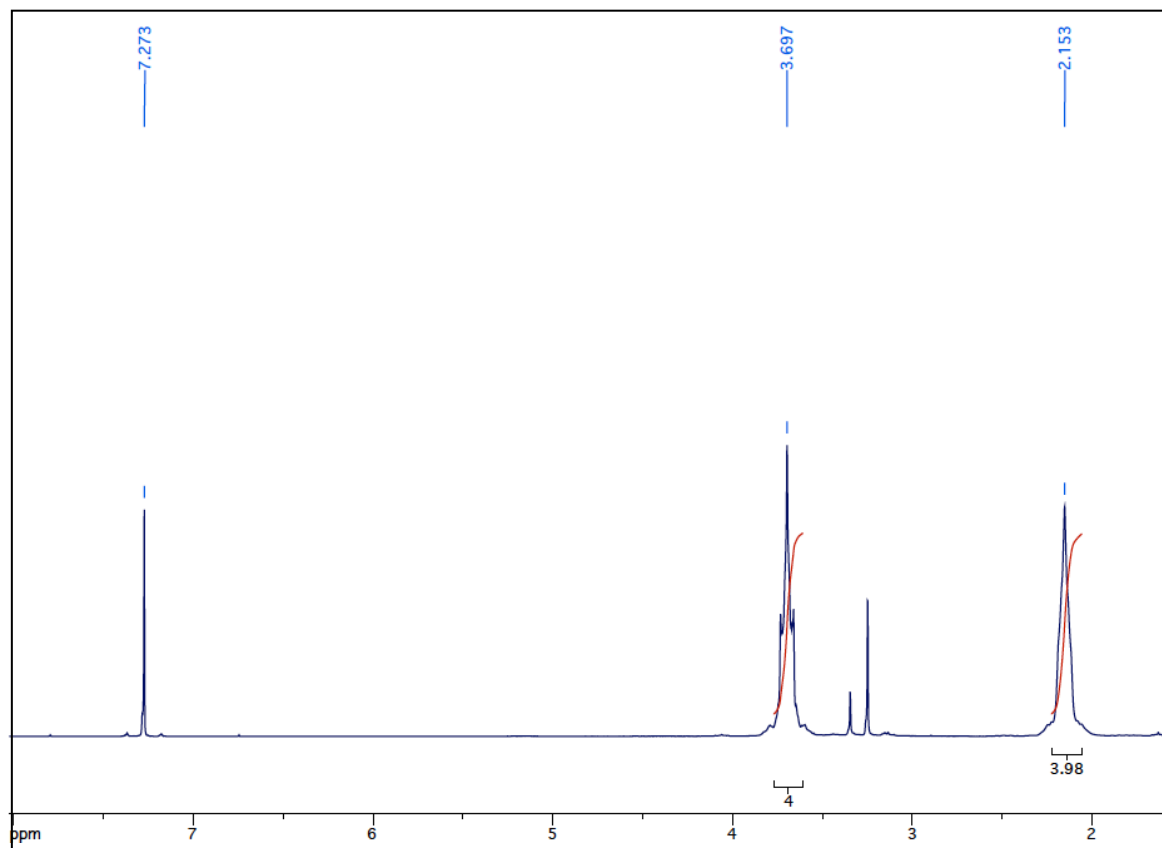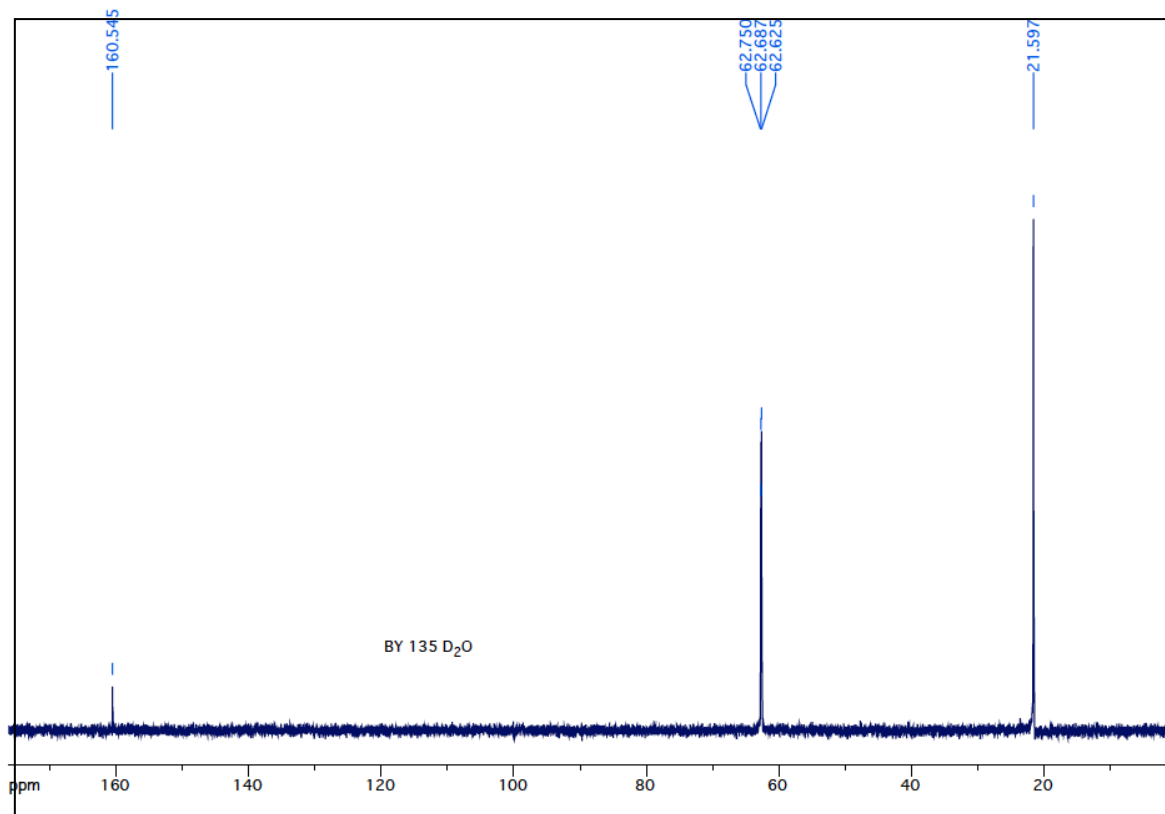

### 3. References.

- (a) J. Shang, S. Liu, X. Ma, L. Lu and Y. Deng; A new route of CO<sub>2</sub> catalytic activation: synthesis of N-substituted carbamates from dialkyl carbonates and polyureas. *Green Chem.*, 2012, **14**, 2899-2906.
- (b) K. Kojima, H. Tsukada, M. Takashina, C. Shimakawa and N. Kakinuma, Method for producing meta-xylylenediisocyanates. US20160145201 A1.
- (c) A. Chilin, G. Marzaro, S. Zanatta, V. Barbieri, G. Pastorini, P. Manzini and A. Guiotto; A new access to quinazolines from simple anilines. *Tetrahedron*, 2006, **62**, 12351-12356.
- (d) T. Sukizaki, S. Fukuda, T. Yamaguchi, K. Fujii, R. Kanzaki, K. Chiba, H. Yamamoto, Y. Umebayashi and S. Ishiguro; Raman Spectroscopic Study and DFT Calculations on the Conformation of 5-azonia-spiro[4.4]nonane cation in crystal and dimethyl carbonate solution. *Electrochemistry*, 2007, **75**, 628-634.
